# Supplementary material for: The gut microbiome influences the bioavailability of olanzapine in rats
Source: PubMed Central journal article supplement (PMC8047500; doi:10.1016/j.ebiom.2021.103307), 2021-04-02
Supplement: mmc2.pdf [file mmc2.pdf]

## SUPPLEMENTAL FIGURES

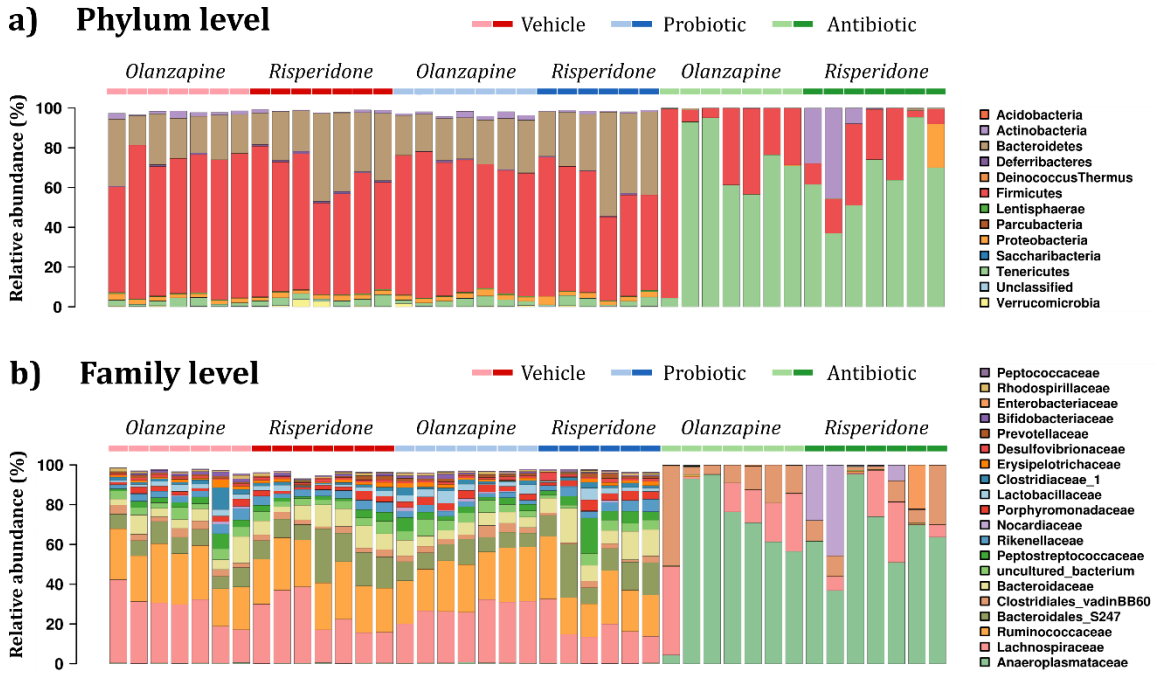

**Figure S1.** Bar charts representing the taxa abundance at the phylum (a) and family (b) levels. The 20 most abundant taxa are shown.

### a) Concentration of antipsychotics in caecum

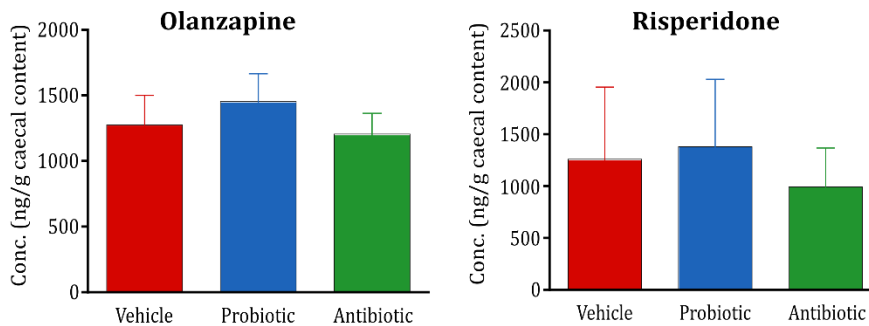

### b) $\beta$ -glucosidase activity in faeces

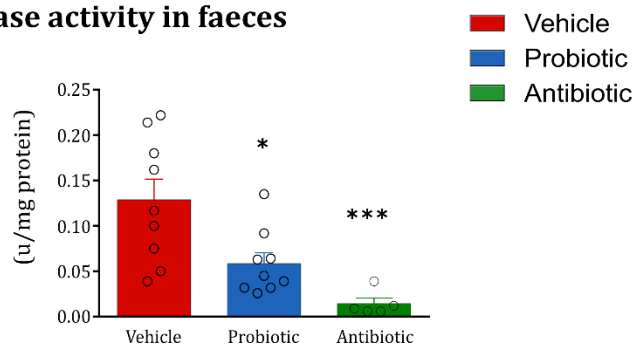

**Figure S2.** Caecal concentration of antipsychotics and faecal enzymatic activity. (a) Antipsychotic concentration in the caecum after oral administration in rats pre-treated with vehicle, probiotic or antibiotic. Neither antibiotic or probiotic treatment significantly altered the concentration of olanzapine ( $n=7$ ) or risperidone ( $n=5-7$ ) in the caecum. Data are expressed as mean + SEM. (b)  $\beta$ -glucosidase activity in rat faecal samples from vehicle, probiotic and antibiotic-treated rats. Data are expressed as mean + SEM. \* $p < 0.05$  \*\*\* $p < 0.001$  ( $n=8$ ).

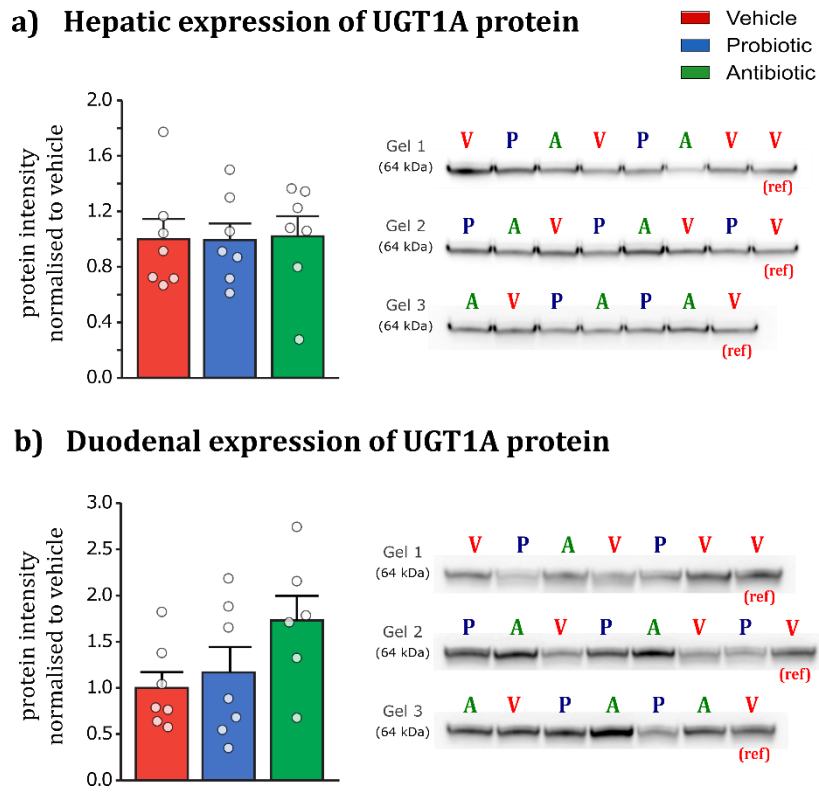

**Figure S3. Hepatic (a) and duodenal (b) UGT1A protein expression in rats pre-treated with vehicle, probiotic or antibiotic.** Probiotic and antibiotic administration do not alter the protein expression of UGT1A family. Data are expressed as mean + SEM, n=6-7/group.

## SUPPLEMENTAL TABLES

**Table S1. Statistics values for relative abundance of bacterial PHYLA in each treatment group (probiotic or antibiotic) as compared to the vehicle. \* $p < 0.05$ , Mann-Whitney U test, Benjamini-Hochberg critical value  $[(i/m)Q]$  with  $i$ =rank;  $m$ =total number of tests;  $Q$  (false-discovery rate)=0.2. N=13-14/group. Red indicates an increase, blue a decrease compared to the vehicle group. ns=not significant**

| Phylum           | Probiotic      |                 | Antibiotic     |                 |
|------------------|----------------|-----------------|----------------|-----------------|
|                  | <i>p value</i> | $(i/m) \cdot Q$ | <i>p value</i> | $(i/m) \cdot Q$ |
| Firmicutes       | ns             | ns              | 0.00           | 0.0181 *        |
| Verrucomicrobia  | ns             | ns              | 0.00           | 0.0363 *        |
| Bacteroidetes    | ns             | ns              | 0.00           | 0.0545 *        |
| Saccharibacteria | ns             | ns              | 0.00           | 0.0727 *        |
| Tenericutes      | ns             | ns              | 0.00           | 0.0909 *        |
| Deferribacteres  | ns             | ns              | 0.00           | 0.1090 *        |
| Proteobacteria   | ns             | ns              | 0.00           | 0.1454 *        |
| Lentisphaerae    | ns             | ns              | 0.00           | 0.1636 *        |
| Unclassified     | ns             | ns              | 0.00           | 0.1818 *        |
| Actinobacteria   | ns             | ns              | 0.02           | 0.2             |

**Table S2. Statistics values for relative abundance of bacterial FAMILIES in each treatment group (probiotic or antibiotic) as compared to the vehicle. \* $p < 0.05$ , Mann-Whitney U test, Benjamini-Hochberg critical value [(i/m)Q] with i=rank; m=total number of tests; Q (false-discovery rate)=0.2. N=13-14/group. Red indicates an increase, blue a decrease compared to the vehicle group. ns=not significant.**

| Family                        | Probiotic      |                | Antibiotic     |                |
|-------------------------------|----------------|----------------|----------------|----------------|
|                               | <i>p value</i> | <i>(i/m)·Q</i> | <i>p value</i> | <i>(i/m)·Q</i> |
| Desulfovibrionaceae           | ns             | ns             | 0.00           | 0.004878 *     |
| Rhodospirillaceae             | ns             | ns             | 0.00           | 0.009756 *     |
| Ruminococcaceae               | ns             | ns             | 0.00           | 0.014634 *     |
| Peptostreptococcaceae         | ns             | ns             | 0.00           | 0.019512 *     |
| Lactobacillaceae              | ns             | ns             | 0.00           | 0.02439 *      |
| Caldicoprobacteraceae         | ns             | ns             | 0.00           | 0.029268 *     |
| Christensenellaceae           | 0.04           | 0.019512 *     | 0.00           | 0.034146 *     |
| Flavobacteriaceae             | ns             | ns             | 0.00           | 0.039024 *     |
| Clostridiaceae_1              | ns             | ns             | 0.00           | 0.043902 *     |
| Bacteroidales_S24_7_group     | ns             | ns             | 0.00           | 0.04878 *      |
| uncultured_rumen_bacterium    | ns             | ns             | 0.00           | 0.053659 *     |
| Peptococcaceae                | ns             | ns             | 0.00           | 0.058537 *     |
| Streptococcaceae              | 0.01           | 0.009756 *     | 0.00           | 0.063415 *     |
| Bifidobacteriaceae            | ns             | ns             | 0.00           | 0.068293 *     |
| Victivallaceae                | ns             | ns             | 0.00           | 0.073171*      |
| Prevotellaceae                | ns             | ns             | 0.00           | 0.078049 *     |
| Anaeroplasmataceae            | ns             | ns             | 0.00           | 0.082927 *     |
| Bacteroidaceae                | ns             | ns             | 0.00           | 0.087805 *     |
| Micrococcaceae                | ns             | ns             | 0.00           | 0.092683 *     |
| Porphyromonadaceae            | 0.01           | 0.004878       | 0.00           | 0.097561 *     |
| Eubacteriaceae                | ns             | ns             | 0.00           | 0.102439 *     |
| Coriobacteriaceae             | ns             | ns             | 0.00           | 0.107317 *     |
| Family_XIII                   | ns             | ns             | 0.00           | 0.112195 *     |
| Unknown_Family                | ns             | ns             | 0.00           | 0.117073 *     |
| Deferribacteraceae            | ns             | ns             | 0.00           | 0.121951 *     |
| Erysipelotrichaceae           | ns             | ns             | 0.00           | 0.126829 *     |
| uncultured_organism           | ns             | ns             | 0.00           | 0.131707 *     |
| Alcaligenaceae                | ns             | ns             | 0.00           | 0.136585 *     |
| Verrucomicrobiaceae           | ns             | ns             | 0.00           | 0.141463 *     |
| Rikenellaceae                 | ns             | ns             | 0.00           | 0.146341 *     |
| uncultured_bacterium          | ns             | ns             | 0.00           | 0.15122 *      |
| Unclassified                  | ns             | ns             | 0.00           | 0.156098 *     |
| Clostridiales_vadinBB60_group | ns             | ns             | 0.00           | 0.160976 *     |
| Pasteurellaceae               | ns             | ns             | 0.00           | 0.165854 *     |
| Thermoanaerobacteraceae       | ns             | ns             | 0.01           | 0.170732 *     |
| Lachnospiraceae               | ns             | ns             | 0.01           | 0.17561 *      |
| Staphylococcaceae             | 0.03           | 0.014634 *     | ns             | ns             |

**Table S3. Statistics for relative abundance of bacterial GENERA in each treatment group as compared to the vehicle.** \* $p < 0.05$ , Mann-Whitney U test, Benjamini-Hochberg critical value  $[(i/m)Q]$  with  $i$  =rank;  $m$ =total number of tests;  $Q$  (false-discovery rate)=0.2.  $N=13-14$ /group. Values in red bold are significantly different from vehicle. Pink highlighted text indicates genera that are increased relative to vehicle whilst blue highlighted text indicates genera that are decreased relative to vehicle.

| Probiotic                        |          |                  |
|----------------------------------|----------|------------------|
| genus                            | <i>p</i> | (i/m)·Q          |
| Streptococcus                    | 0.012    | <b>0.0017094</b> |
| Odoribacter                      | 0.033    | <b>0.0034188</b> |
| Anaerofilum                      | 0.033    | <b>0.0051282</b> |
| Incertae_Sedis                   | 0.043    | <b>0.0068376</b> |
| Marvinbryantia                   | 0.043    | <b>0.008547</b>  |
| Aerococcus                       | 0.043    | <b>0.0102564</b> |
| Erysipelatoclostridium           | 0.043    | <b>0.0119658</b> |
| Eisenbergiella                   | 0.048    | <b>0.0136752</b> |
| Christensenellaceae_R_7_group    | 0.054    | 0.0153846        |
| Staphylococcus                   | 0.061    | 0.017094         |
| Lachnospiraceae_UCG_008          | 0.061    | 0.0188034        |
| Acetitomaculum                   | 0.061    | 0.0205128        |
| Ruminococcaceae_UCG_005          | 0.085    | 0.0222222        |
| Eubacterium_coprostanoligenes_   | 0.094    | 0.0239316        |
| Ruminiclostridium                | 0.094    | 0.025641         |
| Peptoclostridium                 | 0.094    | 0.0273504        |
| Gordonibacter                    | 0.094    | 0.0290598        |
| Coriobacteriaceae_UCG_002        | 0.105    | 0.0307692        |
| Ruminiclostridium_6              | 0.128    | 0.0324786        |
| Alloprevotella                   | 0.141    | 0.034188         |
| Tyzzera                          | 0.141    | 0.0358974        |
| Enterorhabdus                    | 0.155    | 0.0376068        |
| Alistipes                        | 0.155    | 0.0393162        |
| Lachnospiraceae_FCS020_group     | 0.169    | 0.0410256        |
| Coprococcus_3                    | 0.169    | 0.042735         |
| Jeotgalicoccus                   | 0.169    | 0.0444444        |
| Asaccharobacter                  | 0.169    | 0.0461538        |
| Roseburia                        | 0.185    | 0.0478632        |
| Ruminococcus_1                   | 0.22     | 0.0495726        |
| Intestinibacter                  | 0.22     | 0.0512821        |
| Anaerovorax                      | 0.239    | 0.0529915        |
| Lachnoclostridium                | 0.239    | 0.0547009        |
| unidentified                     | 0.259    | 0.0564103        |
| Ruminococcaceae_UCG_003          | 0.28     | 0.0581197        |
| Lachnospiraceae_UCG_010          | 0.302    | 0.0598291        |
| Blautia                          | 0.302    | 0.0615385        |
| Butyricimonas                    | 0.302    | 0.0632479        |
| Lachnospiraceae_NK4A136_grou     | 0.325    | 0.0649573        |
| Ruminococcaceae_NK4A214_gro      | 0.325    | 0.0666667        |
| Mogibacterium                    | 0.325    | 0.0683761        |
| Butyrivibrio                     | 0.325    | 0.0700855        |
| Enterococcus                     | 0.325    | 0.0717949        |
| Ruminococcaceae_UCG_014          | 0.325    | 0.0735043        |
| Ruminiclostridium_9              | 0.35     | 0.0752137        |
| Mucispirillum                    | 0.35     | 0.0769231        |
| Caldicoprobacter                 | 0.375    | 0.0786325        |
| Unclassified_uncultured_bacteriu | 0.402    | 0.0803419        |
| Coprococcus_1                    | 0.402    | 0.0820513        |

| Probiotic contd.                        |          |           |
|-----------------------------------------|----------|-----------|
| genus                                   | <i>p</i> | (i/m)·Q   |
| Lactobacillus                           | 0.43     | 0.0837607 |
| Pasteurella                             | 0.43     | 0.0854701 |
| Bilophila                               | 0.43     | 0.0871795 |
| Bifidobacterium                         | 0.458    | 0.0888889 |
| Unclassified_uncultured_organism        | 0.458    | 0.0905983 |
| Allobaculum                             | 0.458    | 0.0923077 |
| Papillibacter                           | 0.458    | 0.0940171 |
| Gelria                                  | 0.488    | 0.0957265 |
| Eubacterium_ruminantium_group           | 0.488    | 0.0974359 |
| Ruminiclostridium_1                     | 0.488    | 0.0991453 |
| Intestinimonas                          | 0.488    | 0.1008547 |
| Parasutterella                          | 0.519    | 0.1025641 |
| Family_eighth_UCG_001                   | 0.519    | 0.1042735 |
| Candidatus_Arthromitus                  | 0.519    | 0.1059829 |
| Eubacterium_nodatum_group               | 0.55     | 0.1076923 |
| Lachnospiraceae_UCG_001                 | 0.55     | 0.1094017 |
| Acetanaerobacterium                     | 0.55     | 0.1111111 |
| Acetatifactor                           | 0.55     | 0.1128205 |
| Lactonifactor                           | 0.55     | 0.1145299 |
| Lachnospiraceae_UCG_005                 | 0.583    | 0.1162393 |
| Ruminococcus_2                          | 0.583    | 0.1179487 |
| uncultured_rumen_bacterium              | 0.583    | 0.1196581 |
| Lachnospiraceae_NC2004_group            | 0.616    | 0.1213675 |
| Unclassified_unidentified               | 0.616    | 0.1230769 |
| Paraprevotella                          | 0.616    | 0.1247863 |
| Bacteroides                             | 0.616    | 0.1264957 |
| Turicibacter                            | 0.616    | 0.1282051 |
| Enterobacter                            | 0.65     | 0.1299145 |
| Prevotellaceae_UCG_001                  | 0.65     | 0.1316239 |
| Unclassified                            | 0.65     | 0.1333333 |
| Akkermansia                             | 0.685    | 0.1350427 |
| Rothia                                  | 0.72     | 0.1367521 |
| Desulfovibrio                           | 0.72     | 0.1384615 |
| Thalassospira                           | 0.72     | 0.1401709 |
| Ruminococcaceae_UCG_010                 | 0.756    | 0.1418803 |
| Candidatus_Saccharimonas                | 0.756    | 0.1435897 |
| Clostridium_sensu_stricto_1             | 0.793    | 0.1452991 |
| Unclassified_uncultured_Mollicutes      | 0.793    | 0.1470085 |
| Anaerotruncus                           | 0.83     | 0.1487179 |
| Rikenella                               | 0.83     | 0.1504274 |
| Hydrogenoanaerobacterium                | 0.83     | 0.1521368 |
| Natranaerovirga                         | 0.83     | 0.1538462 |
| Oscillibacter                           | 0.83     | 0.1555556 |
| Eubacterium_oxidoreducens_group         | 0.867    | 0.157265  |
| Ruminococcaceae_UCG_009                 | 0.867    | 0.1589744 |
| Lachnospiraceae_NK4B4_group             | 0.867    | 0.1606838 |
| Barnesiella                             | 0.867    | 0.1623932 |
| Flavonifractor                          | 0.867    | 0.1641026 |
| Family_eighth_AD3011_group              | 0.867    | 0.165812  |
| Unclassified_uncultured_rumen_bacterium | 0.867    | 0.1675214 |
| Eubacterium_ventriosum_group            | 0.905    | 0.1692308 |
| Candidatus_Soleaferrea                  | 0.905    | 0.1709402 |
| Asteroleplasma                          | 0.905    | 0.1726496 |
| Victivallis                             | 0.943    | 0.174359  |
| Eubacterium_brachy_group                | 0.943    | 0.1760684 |
| Ruminiclostridium_5                     | 0.943    | 0.1777778 |
| Parabacteroides                         | 0.943    | 0.1794872 |

| Probiotic contd.             |          |           |
|------------------------------|----------|-----------|
| genus                        | <i>p</i> | (i/m)·Q   |
| Ruminococcaceae_UCG_013      | 0.943    | 0.1811966 |
| Anaerofustis                 | 0.981    | 0.182906  |
| Lachnospiraceae_UCG_004      | 0.981    | 0.1846154 |
| Lachnospiraceae_AC2044_group | 0.981    | 0.1863248 |
| uncultured                   | 0.981    | 0.1880342 |
| Sporobacter                  | 1        | 0.1897436 |
| Peptococcus                  | 1        | 0.191453  |
| Rikenellaceae_RC9_gut_group  | 1        | 0.1931624 |
| Anaeroplasma                 | 1        | 0.1948718 |
| Tyzzarella_3                 | 1        | 0.1965812 |
| Senegalimassilia             | 1        | 0.1982906 |
| Shuttleworthia               | 1        | 0.2       |

| <b>Antibiotic</b>                |                 |                  |
|----------------------------------|-----------------|------------------|
| <b>genus</b>                     | <b><i>p</i></b> | <b>(i/m)·Q</b>   |
| Lachnospiraceae_NC2004_group     | 0               | <b>0.0017094</b> |
| Coriobacteriaceae_UCG_002        | 0               | <b>0.0034188</b> |
| Eubacterium_ventriosum_group     | 0               | <b>0.0051282</b> |
| Lachnospiraceae_UCG_005          | 0               | <b>0.0068376</b> |
| Ruminiclostridium_9              | 0               | <b>0.008547</b>  |
| Eubacterium_coprostanoligenes_   | 0               | <b>0.0102564</b> |
| Incertae_Sedis                   | 0               | <b>0.0119658</b> |
| Roseburia                        | 0               | <b>0.0136752</b> |
| Ruminococcus_1                   | 0               | <b>0.0153846</b> |
| Lactobacillus                    | 0               | <b>0.017094</b>  |
| Victivallis                      | 0               | <b>0.0188034</b> |
| Bifidobacterium                  | 0               | <b>0.0205128</b> |
| Eubacterium_brachy_group         | 0               | <b>0.0222222</b> |
| Marvinbryantia                   | 0               | <b>0.0239316</b> |
| Eubacterium_oxidoreducens_grou   | 0               | <b>0.025641</b>  |
| Ruminococcaceae_UCG_009          | 0               | <b>0.0273504</b> |
| Enterorhabdus                    | 0               | <b>0.0290598</b> |
| Clostridium_sensu_stricto_1      | 0               | <b>0.0307692</b> |
| Unclassified_uncultured_organism | 0               | <b>0.0324786</b> |
| Lachnospiraceae_UCG_010          | 0               | <b>0.034188</b>  |
| Ruminococcus_2                   | 0               | <b>0.0358974</b> |
| Eubacterium_ruminantium_group    | 0               | <b>0.0376068</b> |
| Anaerovorax                      | 0               | <b>0.0393162</b> |
| Ruminococcaceae_UCG_003          | 0               | <b>0.0410256</b> |
| Anaerofustis                     | 0               | <b>0.042735</b>  |
| Lachnospiraceae_NK4A136_group    | 0               | <b>0.0444444</b> |
| Ruminococcaceae_UCG_010          | 0               | <b>0.0461538</b> |
| Parasutterella                   | 0               | <b>0.0478632</b> |
| Ruminococcaceae_NK4A214_group    | 0               | <b>0.0495726</b> |
| Streptococcus                    | 0               | <b>0.0512821</b> |
| Mogibacterium                    | 0               | <b>0.0529915</b> |
| Akkermansia                      | 0               | <b>0.0547009</b> |
| Butyrivibrio                     | 0               | <b>0.0564103</b> |
| Rothia                           | 0               | <b>0.0581197</b> |
| Ruminiclostridium_5              | 0               | <b>0.0598291</b> |
| Lachnospiraceae_NK4B4_group      | 0               | <b>0.0615385</b> |
| Eubacterium_nodatum_group        | 0               | <b>0.0632479</b> |
| Barnesiella                      | 0               | <b>0.0649573</b> |
| Anaerotruncus                    | 0               | <b>0.0666667</b> |
| Christensenellaceae_R_7_group    | 0               | <b>0.0683761</b> |
| Peptococcus                      | 0               | <b>0.0700855</b> |
| Parabacteroides                  | 0               | <b>0.0717949</b> |
| Rikenella                        | 0               | <b>0.0735043</b> |
| Bilophila                        | 0               | <b>0.0752137</b> |
| unidentified                     | 0               | <b>0.0769231</b> |
| Lachnospiraceae_UCG_004          | 0               | <b>0.0786325</b> |
| Lachnospiraceae_AC2044_group     | 0               | <b>0.0803419</b> |
| Hydrogenoanaerobacterium         | 0               | <b>0.0820513</b> |
| Paraprevotella                   | 0               | <b>0.0837607</b> |
| Lachnospiraceae_FCS020_group     | 0               | <b>0.0854701</b> |
| uncultured_rumen_bacterium       | 0               | <b>0.0871795</b> |
| Lachnospiraceae_UCG_008          | 0               | <b>0.0888889</b> |
| Alloprevotella                   | 0               | <b>0.0905983</b> |
| Desulfovibrio                    | 0               | <b>0.0923077</b> |
| Natranaerovirga                  | 0               | <b>0.0940171</b> |
| Ruminococcaceae_UCG_005          | 0               | <b>0.0957265</b> |
| Blautia                          | 0               | <b>0.0974359</b> |



| <b>Antibiotic contd.</b>         |                 |                  |
|----------------------------------|-----------------|------------------|
| <b>genus</b>                     | <b><i>p</i></b> | <b>(i/m)·Q</b>   |
| Lachnospiraceae_UCG_001          | 0               | <b>0.0991453</b> |
| Eisenbergiella                   | 0               | <b>0.1008547</b> |
| Family_XIII_UCG_001              | 0               | <b>0.1025641</b> |
| Rikenellaceae_RC9_gut_group      | 0               | <b>0.1042735</b> |
| Ruminiclostridium_1              | 0               | <b>0.1059829</b> |
| Ruminiclostridium                | 0               | <b>0.1076923</b> |
| Acetitomaculum                   | 0               | <b>0.1094017</b> |
| Coprococcus_3                    | 0               | <b>0.1111111</b> |
| Ruminiclostridium_6              | 0               | <b>0.1128205</b> |
| Unclassified_uncultured_bacteriu | 0               | <b>0.1145299</b> |
| Candidatus_Soleaferrea           | 0               | <b>0.1162393</b> |
| Acetatifactor                    | 0               | <b>0.1179487</b> |
| Intestinimonas                   | 0               | <b>0.1196581</b> |
| Anaeroplasma                     | 0               | 0.1213675        |
| Bacteroides                      | 0               | <b>0.1230769</b> |
| Allobaculum                      | 0               | <b>0.1247863</b> |
| Odoribacter                      | 0               | <b>0.1264957</b> |
| Flavonifractor                   | 0               | <b>0.1282051</b> |
| Lachnoclostridium                | 0               | <b>0.1299145</b> |
| Peptoclostridium                 | 0               | <b>0.1316239</b> |
| Erysipelatoclostridium           | 0               | <b>0.1333333</b> |
| Tyzzereella                      | 0               | <b>0.1350427</b> |
| Anaerofilum                      | 0               | <b>0.1367521</b> |
| Ruminococcaceae_UCG_013          | 0               | <b>0.1384615</b> |
| Family_XIII_AD3011_group         | 0               | <b>0.1401709</b> |
| Unclassified_uncultured_rumen_b  | 0               | <b>0.1418803</b> |
| Butyricimonas                    | 0               | <b>0.1435897</b> |
| Caldicoprobacter                 | 0               | <b>0.1452991</b> |
| Tyzzereella_3                    | 0               | <b>0.1470085</b> |
| Asteroleplasma                   | 0               | <b>0.1487179</b> |
| Asaccharobacter                  | 0               | <b>0.1504274</b> |
| Alistipes                        | 0               | <b>0.1521368</b> |
| Ruminococcaceae_UCG_014          | 0               | <b>0.1538462</b> |
| uncultured                       | 0               | <b>0.1555556</b> |
| Senegalimassilia                 | 0               | <b>0.157265</b>  |
| Shuttleworthia                   | 0               | <b>0.1589744</b> |
| Papillibacter                    | 0               | <b>0.1606838</b> |
| Turicibacter                     | 0               | <b>0.1623932</b> |
| Gordonibacter                    | 0               | <b>0.1641026</b> |
| Candidatus_Saccharimonas         | 0               | <b>0.165812</b>  |
| Prevotellaceae_UCG_001           | 0               | <b>0.1675214</b> |
| Oscillibacter                    | 0               | <b>0.1692308</b> |
| Thalassospira                    | 0               | <b>0.1709402</b> |
| Coprococcus_1                    | 0               | <b>0.1726496</b> |
| Mucispirillum                    | 0               | <b>0.174359</b>  |
| Unclassified                     | 0               | <b>0.1760684</b> |
| Pasteurella                      | 0.001           | <b>0.1777778</b> |
| Sporobacter                      | 0.001           | <b>0.1794872</b> |
| Acetanaerobacterium              | 0.003           | <b>0.1811966</b> |
| Candidatus_Arthromitus           | 0.003           | <b>0.182906</b>  |
| Lactonifactor                    | 0.003           | <b>0.1846154</b> |
| Gelria                           | 0.008           | <b>0.1863248</b> |
| Unclassified_uncultured_Mollicut | 0.056           | 0.1880342        |
| Enterobacter                     | 0.062           | 0.1897436        |
| Enterococcus                     | 0.125           | 0.191453         |
| Staphylococcus                   | 0.178           | 0.1931624        |
| Unclassified_unidentified        | 0.21            | 0.1948718        |

| Antibiotic contd. |          |           |
|-------------------|----------|-----------|
| genus             | <i>p</i> | (i/m)·Q   |
| Intestinibacter   | 0.541    | 0.1965812 |
| Jeotgalicoccus    | 0.769    | 0.1982906 |
| Aerococcus        | 1        | 0.2       |

**Table S4. List of SybrGreen probes used in the study. Provider company: Eurofins Genomics.**

| Gene     | Common gene name                              | Sequence (5' → 3')<br>left   | Sequence (5' → 3')<br>right |
|----------|-----------------------------------------------|------------------------------|-----------------------------|
| Actin β  | Actin beta                                    | CCCGCGAGTACAACCTTCT          | CGTCATCCATGGCGAACT          |
| Occludin | Occludin                                      | GCTATGAAACCGACTACACGACA      | ACTCTCCAGCAACCAGCATCT       |
| ZO-1     | Zonula occludens-1                            | AGGCTATTTCCAGCGTTTTGA        | AATCCTGGTGGTGGTACTTGC       |
| MDR-1a   | Multidrug resistance protein 1a               | GAAAGGAATTTACTTCAAACCTTGTC A | CACAAGCTTCATTTCTAATTCAA     |
| CYP1A2   | Cytochrome P450 Family 1 Subfamily A Member 2 | AATGACATCTTTGGAGCTGGAT       | GGGCTCTGTCACAAGTAGCA        |
| CYP3A1   | Cytochrome P450 Family 3 Subfamily A Member 1 | CATGTCTGAGGATGAAGAATGG       | TGTCTCATGAGGGGAACAT         |
| CYP2D1   | Cytochrome P450 Family 2 Subfamily D Member 1 | GAGTGTTGGCCAGTGGTCTT         | CAGCAGCTCCATGTCTGC          |

## SUPPLEMENTAL METHODS

### Caecal microbiota composition

Caecum was harvested, snap frozen and stored at -80°C prior to the analysis.

- *Caecal content DNA extraction*

DNA extraction was performed using the QIAmp Fast DNA Stool Mini Kit (Qiagen, Sussex, UK) coupled with an initial bead-beating step. Briefly, 200 mg of each caecal sample were vortex-mixed in a 2 ml screw-cap tubes (Sarstedt, Wexford, Ireland) containing 0.25 g of a 1:1 mix of 0.1 mm and 1.0 mm sterile zirconia beads plus a single 3.5 mm diameter bead (BioSpec Products, Bartlesville, USA) with 1 ml of Qiagen InhibitEX® buffer. Following steps were according to manufacturer's instructions. DNA was quantified using the Qubit™ 3.0 Fluorometer (Bio-Sciences, Dublin, Ireland) and the Qubit® dsDNA HS Assay Kit (Life Technologies, Oregon, USA). Extracted DNA was kept frozen at -20°C until further analysis.

- *16S rRNA Gene Sequence-based microbiota analysis*

The V3-V4 hypervariable region of the 16S rRNA gene were amplified and prepared for sequencing as outlined in the Illumina 16S Metagenomic Sequencing Library Protocol ([http://www.illumina.com/content/dam/illumina-support/documents/documentation/chemistry\\_documentation/16s/16s-metagenomic-library-prep-guide-15044223-b.pdf](http://www.illumina.com/content/dam/illumina-support/documents/documentation/chemistry_documentation/16s/16s-metagenomic-library-prep-guide-15044223-b.pdf)). Briefly, first PCR was done using forward primer (5'-TCGTCGGCAGCGTCAGATGTGTATAAGAGACAGCTACGGGNGGCWGCAG-3') and reverse primer (5'-GTCTCGTGGGCTCGGAGATGTGTATAAGAGACAGGACTACHVGGGTATCTAATCC-3'). Each 25 µl PCR reaction contained 5 ng/µl microbial genomic DNA, 1 µM of each primer and 12.5 µl 2X Kapa HiFi Hotstart ReadyMix (Kapa Biosystems Ltd., UK). The PCR conditions follow as: initial denaturation at 95 °C x 3 min; 25 cycles of 95 °C x 30 s, 55 °C x 30 s, 72 °C x 30 s; and 72 °C x 5 min for final extension. PCR products were purified with Agencourt AMPure XP system (Beckman Coulter Genomics, Takeley, UK). In the next step, dual indices and Illumina sequencing adapters were attached to PCR products using the Nextera XT Index Kit (Illumina, San Diego, CA). Each 50 µl PCR reaction contained 5 µl purified DNA, 5 µl index primer 1 (N7xx), 5 µl index primer 2 (S5xx), 25 µl 2x Kapa HiFi Hot Start Ready mix and 10 µl PCR grade water. PCR amplification was completed using the previous program but with only 8 amplification cycles instead of 25. Following this, a second clean-up step with the Agencourt AMPure XP system was done. PCR products were quantified, normalized and pooled in an equimolar fashion using the Qubit® dsDNA HS Assay Kit (Life Technologies, Oregon, USA). Next steps in the library preparation were carried out by Teagasc Next Generation DNA Sequencing Facility (Teagasc, Moorepark, Food Research Centre) prior to 2×250 (bp) paired-end sequencing on the Illumina MiSeq platform, using standard Illumina sequencing protocols.

- *Bioinformatic sequence analysis*

Bioinformatic sequence analysis was performed as previously described (1). Briefly, paired-end sequences were assembled using FLASH (2) and analysed using QIIME v1.8.0 (Quantitative Insights Into Microbial Ecology) (3). Sequences were quality checked and the remaining sequences were clustered into operational taxonomic units using USEARCH (v7-64bit) (4). Taxonomic ranks were assigned with a BLAST search against the SILVA SSURef database release 123 (5). Alpha and beta diversities and Bray-Curt dissimilarities were generated in Calypso (version 8.84) Principal coordinate analysis (PCoA) plots were visualized with ggplot2 (V 2.2.1) using OTU values normalized with the wisconsin function in the vegan package (v. 2.5-1). Adonis function (PERMANOVA, permutations=999) in the vegan package (v 2.5-1) was performed on Bray-Curtis matrix on three dimensions. Relative abundance of bacterial taxa was expressed as % of identified sequences.

### High performance liquid chromatography (HPLC) detection of the drugs in plasma and caecal contents

- *Plasma Sample Preparation and HPLC Conditions*

*Olanzapine*: The liquid-liquid extraction (LLE) protocol and HPLC conditions employed for the detection of olanzapine in plasma samples was based on a previous method with some modifications (6). 20 µl of the internal standard (I.S.), clozapine, was added to 50 µl of plasma sample (to yield final clozapine concentration of 400 ng/ml) (Discovery Fine Chemicals, UK). After sample alkalisation with 100 µl of Na<sub>2</sub>CO<sub>3</sub> (2M), 750 µl of hexane: dichloromethane: (85:15,

v/v) was added as an extraction solvent. Tubes were mixed on an eppendorf shaker at maximum speed (1400 rpm) for 5 minutes at 4 °C, followed by sonication for 4 minutes (Branson Ultrasonic Cleaner 5510EDTH, Sigma). The clear supernatant was isolated in a new eppendorf. A further 750 µl of the extraction solvent was added to the cloudy pellet. Samples were mixed vigorously for 30 minutes and centrifuged at maximum speed for 10 minutes. The supernatant was again isolated. The tubes were dried under a stream of nitrogen (approx. 15-20 minutes) to evaporate the extraction solvent and reconstituted with 100 µl of mobile phase. Compounds were eluted isocratically over a 16 min runtime at a flow rate of 1 ml/min. The mobile phase consists of 14% acetonitrile in water (containing 0.25% H<sub>3</sub>PO<sub>4</sub> and 0.05% triethylamine). The limit of quantitation for risperidone was 15.6 ng/ml.

*Risperidone*: The liquid-liquid extraction (LLE) protocol and HPLC conditions employed for the detection of risperidone in plasma samples was based on a previous method with some modifications (7). Briefly, 100 µl of NaOH (2M) was added to 50 µl plasma samples spiked with 20 µl of I.S. (to yield final clozapine concentration of 2000 ng/ml). Tubes were vortex-mixed for 30s and 1ml diisopropyl ether-isoamyl alcohol (99:1, v/v) was added as extraction solvent. Following 10 minutes of vigorous mixing, samples are centrifuged at 4000rpm for 10 minutes. The organic phase was back extracted with 100 µl of potassium phosphate (0.1M, pH 2.2) and 30 µl of the acid solution was injected onto the HPLC column. The mobile phase consisted of acetonitrile: potassium dihydrogenphosphate [0.05M pH 3.7, pH adjusted with 25% phosphoric acid] (30:70) and was filtered through Millipore 0.22 µm Durapore filters (Millipore, Ireland). Compounds were eluted isocratically over a 12 min runtime at a flow rate of 1 ml/min. The column was maintained at room temperature and samples/standards were kept at 8 °C in the cooled autoinjector prior to analysis. The limit of quantitation for risperidone was 62.5 ng/ml.

- *Sample Preparation and Drug Extraction from Caecal Contents*

To quantify the amount of risperidone and olanzapine present in the caecum of the rats, 200mg of caecal contents from each animal was isolated and suspended in 1 ml of HPLC grade water and homogenised using a bead-beater for 3·1minute intervals. The same LLE procedure was used to process the caecal samples as that detailed for the plasma samples; the only difference involving the volume of starting material, 100 µl of the homogenised caecal content was used instead of 50 µl plasma.

- *HPLC Equipment*

The HPLC with ultraviolet detection (HPLC-UV) system consisted of Agilent 1260 Infinity Binary LC (Agilent Technologies). System components were used in conjunction with EZChrom Elite software (Mason Technology). The detector used was the 1260 Infinity II Diode Array. All samples for both drugs were injected onto a reversed phase Synergi RP 4 µm MAX-RP HPLC Column 4.60 X 250 mm column (Phenomenex), which was protected by a SecurityGuard HPLC (Phenomenex).

## References

1. Murphy K, Curley D, O'Callaghan TF, O'Shea C-A, Dempsey EM, O'Toole PW, et al. The Composition of Human Milk and Infant Faecal Microbiota Over the First Three Months of Life: A Pilot Study. *Scientific Reports*. 2017;7:40597.
2. Magoč T, Salzberg SL. FLASH: fast length adjustment of short reads to improve genome assemblies. *Bioinformatics*. 2011;27(21):2957-63.
3. Caporaso JG, Kuczynski J, Stombaugh J, Bittinger K, Bushman FD, Costello EK, et al. QIIME allows analysis of high-throughput community sequencing data. *Nat Methods*. 2010;7.
4. Edgar RC. Search and clustering orders of magnitude faster than BLAST. *Bioinformatics*. 2010;26(19):2460-1.
5. Quast C, Pruesse E, Yilmaz P, Gerken J, Schweer T, Yarza P, et al. The SILVA ribosomal RNA gene database project: improved data processing and web-based tools. *Nucleic Acids Research*. 2013;41(D1):D590-D6.
6. Dusci LJ, Peter Hackett L, Fellows LM, Ilett KF. Determination of olanzapine in plasma by high-performance liquid chromatography using ultraviolet absorbance detection. *J Chromatogr B Analyt Technol Biomed Life Sci*. 2002;773(2):191-7.
7. Avenoso A, Facciola G, Salemi M, Spina E. Determination of risperidone and its major metabolite 9-hydroxyrisperidone in human plasma by reversed-phase liquid chromatography with ultraviolet detection. *J Chromatogr B Biomed Sci Appl*. 2000;746(2):173-81.
