# Supplementary material for: The gut microbiome influences the bioavailability of olanzapine in rats
Source: PubMed Central journal article supplement (PMC8047500; doi:10.1016/j.ebiom.2021.103307), 2021-04-02
Supplement: mmc3.pdf [file mmc3.pdf]

## Permission to acknowledge

I give my permission to be acknowledged in the manuscript

*“The gut microbiome influences the bioavailability of olanzapine in rats” (ID EBIOM-D-19-03600R1)*

(Authors: Sofia Cussotto, Jacinta Walsh, Anna V. Golubeva, Alexander V. Zhdanov, Conall R. Strain, Fiona Fouhy, Catherine Stanton, Timothy G. Dinan, Niall P. Hyland, Gerard Clarke, John F. Cryan, Brendan T. Griffin)

*Signature*

A handwritten signature in black ink, appearing to be 'LF', with several loops and a horizontal line at the bottom.

*Print name*

Laura Finnegan

*Date* 02/03/21

**Permission to acknowledge**

I give my permission to be acknowledged in the manuscript

*“The gut microbiome influences the bioavailability of olanzapine in rats” (ID EBIOM-D-19-03600R1)*

(Authors: Sofia Cussotto, Jacinta Walsh, Anna V. Golubeva, Alexander V. Zhdanov, Conall R. Strain, Fiona Fouhy, Catherine Stanton, Timothy G. Dinan, Niall P. Hyland, Gerard Clarke, John F. Cryan, Brendan T. Griffin)

*Signature*

A handwritten signature in black ink, appearing to read "Paul Cotter", with a long horizontal stroke extending to the right.

*Print name*

Paul Cotter

*Date* 1/3/21

**Permission to acknowledge**

I give my permission to be acknowledged in the manuscript

*“The gut microbiome influences the bioavailability of olanzapine in rats” (ID EBIOM-D-19-03600R1)*

(Authors: Sofia Cussotto, Jacinta Walsh, Anna V. Golubeva, Alexander V. Zhdanov, Conall R. Strain, Fiona Fouhy, Catherine Stanton, Timothy G. Dinan, Niall P. Hyland, Gerard Clarke, John F. Cryan, Brendan T. Griffin)

*Signature*

*Fiona Crispie*

*Print name*

Fiona Crispie

*Date 1/3/21*

**Permission to acknowledge**

I give my permission to be acknowledged in the manuscript

*“The gut microbiome influences the bioavailability of olanzapine in rats” (ID EBIOM-D-19-03600R1)*

(Authors: Sofia Cussotto, Jacinta Walsh, Anna V. Golubeva, Alexander V. Zhdanov, Conall R. Strain, Fiona Fouhy, Catherine Stanton, Timothy G. Dinan, Niall P. Hyland, Gerard Clarke, John F. Cryan, Brendan T. Griffin)

*Signature*



---

*Print name*

Kenneth O'Riordan

*Date* 01 March 2021

## Permission to acknowledge

I give my permission to be acknowledged in the manuscript

*"The gut microbiome influences the bioavailability of olanzapine in rats" (ID EBIOM-D-19-03600R1)*

(Authors: Sofia Cussotto, Jacinta Walsh, Anna V. Golubeva, Alexander V. Zhdanov, Conall R. Strain, Fiona Fouhy, Catherine Stanton, Timothy G. Dinan, Niall P. Hyland, Gerard Clarke, John F. Cryan, Brendan T. Griffin)

Signature

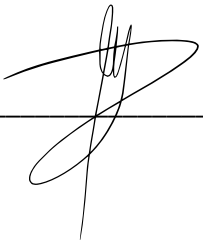

---

Print name

Maša Primožič

Date 25.2.2021

**Permission to acknowledge**

I give my permission to be acknowledged in the manuscript

*"The gut microbiome influences the bioavailability of olanzapine in rats" (ID EBIOM-D-19-03600R1)*

(Authors: Sofia Cussotto, Jacinta Walsh, Anna V. Golubeva, Alexander V. Zhdanov, Conall R. Strain, Fiona Fouhy, Catherine Stanton, Timothy G. Dinan, Niall P. Hyland, Gerard Clarke, John F. Cryan, Brendan T. Griffin)

Signature 

---

*Print name*

Patrick Fitzgerald

*Date* 25<sup>th</sup> February 2021
